# Supplementary material
Source: Springer Nature journal article supplement (https://www.springermedizin.de/resource/supplementary/12879_2012_2149_MOESM3_ESM.pdf/9443762)

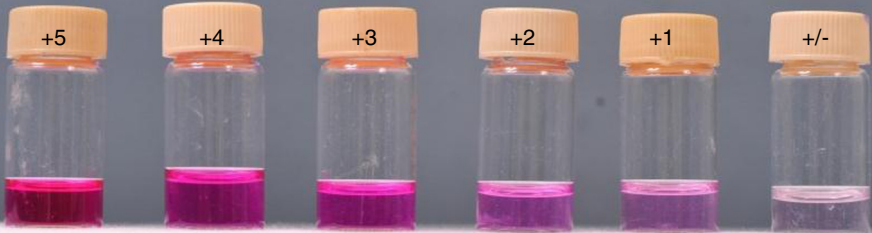

+5

+4

+3

+2

+1

+/-

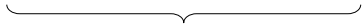

Positive colour range

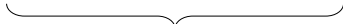

Negative colour range

Supplement: MOESM3 [file 9443762]
